# Supplementary material
Source: Springer Nature journal article supplement (http://www.springermedizin.de/resource/supplementary/12876_2008_273_MOESM3_ESM.pdf/9439066)

A.

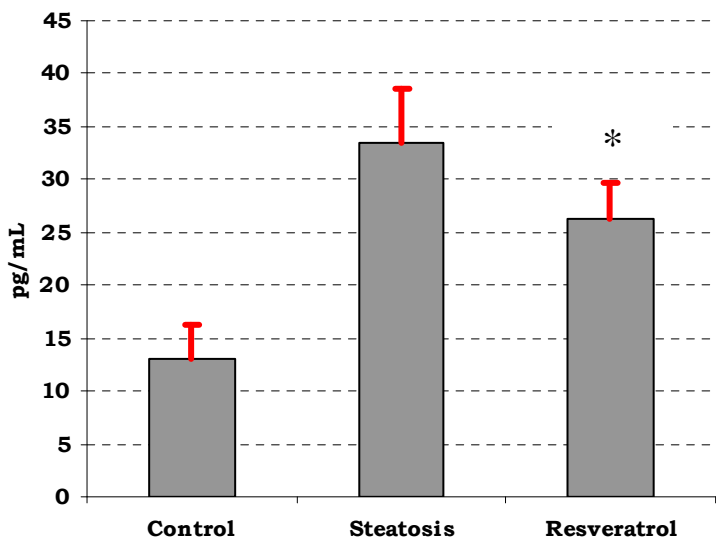

\* $P < 0.05$  as compared to steatosis group

B.

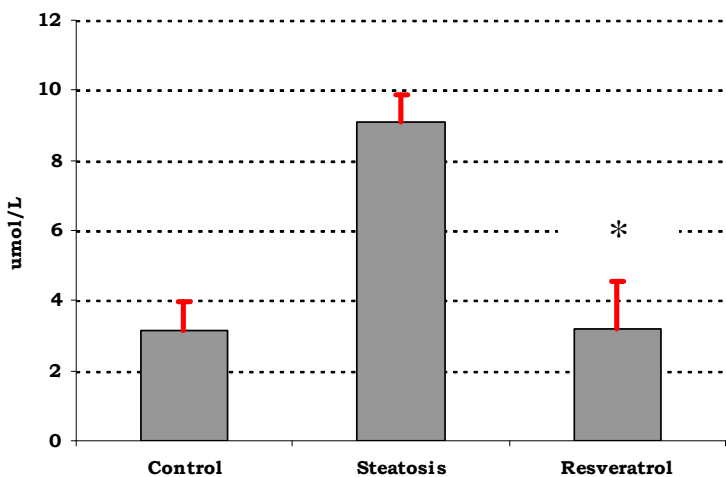

\* $P < 0.05$  as compared to steatosis group

Supplement: MOESM3 [file 9439066]
